# Supplementary material
Source: PubMed Central journal article supplement (PMC7434452)
Supplement: mmc1.pdf [file mmc1.pdf]

# THE LANCET Neurology

## Supplementary appendix

This appendix formed part of the original submission. We post it as supplied by the authors.

Supplement to: Ibanez A, Kosik KS, for the Latin America and the Caribbean Consortium on Dementia (LAC-CD). COVID-19 in older people with cognitive impairment in Latin America. *Lancet Neurol* 2020; **19**: 719–21.

## Appendix

### Latin America and Caribbean Consortium on Dementia (LAC-CD)

<http://lac-cd.org/en/home/m>

#### Contributing Authors

Agustin Ibanez 1-5 #, Hernando Santamaria-Garcia 6, Alejandra Guerrero Barragan \*1,7, Alexander Kornhuber \*1, Alyne Mendonca Marques Ton \*8, Andrea Slachevsky \*9-12, Antonio Lucio Teixeira \*13, Beatriz Marcela Mar Meza \*1, Cecilia M Serrano \*14, Carlos Cano \*6, Carolina Arias Gonzalez\* 39, Christopher Butler \*15-17, Claudia Duran-Aniotz \*4,10,119, Daisy Acosta \*20, Diana L Matallana \*6, Diego Acosta-Alvear \* 39, Dominic Trépel \*21, Elisa De Paula França Resende \*1,13,29, Fernanda G. De Felice \*22, Gorka Navarrete \*4, Ioannis Tarnanas \*23,24, Irene B. Meier \*23,24, Jerusa Smid \*25, Julian Bustin \*18, Laís Fajersztajn \*1,26 Leonel Tadao Takada \*27, Lissette Duque \*28, Maria Aparecida Camargos Bicalho \*29, María Isabel Behrens \*11,30, Maritza Pintado-Caipa \*1, 31, Maxwell Z. Wilson \* 38, Myriam De La Cruz Puebla \*1,32, Nilton Custodio \*31, Rodrigo Santibanez \*17, 33, Rodrigo Bernardo Serafim \*34, Ronnielly Melo Tavares \*35, Stefanie Danielle Piña Escudero \*1, Tomas Leon Rodriguez \*9, Walter Dawson \*1,36,37, Bruce Miller 1 , Kenneth S. Kosik 38 #

#### Affiliations

1. Global Brain Health Institute (GBHI), University of California San Francisco (UCSF), USA
2. Universidad de San Andrés, Buenos Aires, Argentina
3. National Scientific and Technical Research Council (CONICET), Buenos Aires, Argentina
4. Center for Social and Cognitive Neuroscience (CSCN), Universidad Adolfo Ibanez, School of Psychology, Adolfo Ibañez University, Santiago de Chile
5. Universidad Autónoma del Caribe, Barranquilla, Barranquilla, Colombia
6. Pontificia Universidad Javeriana, Bogotá. Departamentos de Psiquiatría, Instituto de Envejecimiento, Centro de Memoria y Cognición Intellectus, Hospital Universitario San Ignacio, Bogotá, Colombia.
7. Servicio de Neurología, Subred de Servicios de Salud Suroccidente, Bogotá. Colombia
8. Department of Neurology and Neurosurgery, Escola Paulista de Medicina, Federal University of São Paulo (UNIFESP), São Paulo, Brazil
9. Memory and Neuropsychiatric Clinic (CMYN), Neurology Department, Del Salvador Hospital and University of Chile Faculty of Medicine, Santiago, Chile
10. Geroscience Center for Brain Health and Metabolism (GERO), Faculty of Medicine, University of Chile, Santiago, Chile.
11. Neuropsychology and Clinical Neuroscience Laboratory (LANNEC), Physiopathology Department - ICBM, Neuroscience and East Neuroscience Departments, Faculty of Medicine, University of Chile, Santiago, Chile.
12. Department of Neurology and Psychiatry, Clínica Alemana-Universidad del Desarrollo, Santiago, Chile.
13. Instituto de Ensino e Pesquisa, Santa Casa BH, Belo Horizonte, Brasil; UT Health Houston, USA.
14. Cognitive Neurology, Department of Neurology, César Milstein Hospital; ALMA (Asociación de Lucha contra el Mal de Alzheimer y alteraciones semejantes de la República Argentina); Research Ethics Committee. Ministry of Health of Buenos Aires, Argentina.
15. Department of Brain Sciences, Imperial College London, UK
16. Nuffield Department of Clinical Neurosciences, University of Oxford, UK
17. Department of Neurology, Pontificia Universidad Católica de Chile, Santiago, Chile
18. Instituto de Neurología Cognitiva, INCYT, Buenos Aires, Argentina
19. Biomedical Neuroscience Institute, Faculty of Medicine, University of Chile, Santiago, Chile.
20. Universidad Nacional Pedro Henriquez Ureña (UNPHU), Internal Medicine Department, Geriatric Section, Santo Domingo, Dominican Republic.
21. Global Brain Health Institute, Trinity College Dublin, Ireland.
22. Federal University of Rio de Janeiro, Brazil/ Queen's University, Canada.
23. Altoida Inc., 2100 West Loop South, Suite 1450, Houston, TX 77027, USA
24. Swiss National Task Force for Dementia.
25. Department of Neurology, University of Sao Paulo; Institute of Infectious Diseases Emilio Ribas, São Paulo, Brazil.
26. Department of Pathology, Laboratory of Experimental Air Pollution, University of São Paulo School of Medicine, Brazil.

27. Hospital das Clinicas, University of Sao Paulo Medical School, Brazil.
28. Cognitive Disorders Unit; Neuromedcenter; National Commission in Bioethics, Quito – Ecuador
29. Federal University of Minas Gerais, Belo Horizonte, Brazil
30. Departamento de Neurología & Neurocirugía Hospital Clínico; Departamento de Neurociencias; Centro de Investigación Clínica Avanzada (CICA) Facultad de Medicina; Hospital Clínico. Universidad de Chile, Santiago, Chile.
31. Unit Cognitive Impairment and Dementia Prevention, Cognitive Neurology Center, Peruvian Institute of Neurosciences, Lima, Perú.
32. Vall d’Hebron Research Institute (VHIR), Autonomie University of Barcelona, Barcelona, Spain.
33. Neurology Service, Complejo Asistencial Dr. Sótero del Río, Santiago, Chile.
34. Federal University of Rio de Janeiro, Rio de Janeiro, Brazil.
35. Behavioral Neurology Clinic, Santa Casa de Belo Horizonte, MG, Brazil.
36. Department of Neurology, School of Medicine, Oregon Health & Science University, Portland, OR, USA.
37. Institute on Aging, College of Urban & Public Affairs, Portland State University, Portland, OR, USA.
38. Neuroscience Research Institute and Dept of Molecular Cellular and Developmental Biology, University of California Santa Barbara, CA.

**\* Authors listed alphabetically**

**# Corresponding authors:** Agustin Ibanez ([agustin.ibanez@gbhi.org](mailto:agustin.ibanez@gbhi.org), +54 91130279893) and Kenneth S. Kosik ([kosik@lifesci.ucsb.edu](mailto:kosik@lifesci.ucsb.edu), + 1 8058935222)

AI is partially supported by grants from CONICET, CONICYT/FONDECYT Regular (1170010 and 1171200), FONCYT-PICT 2017-1818, FONCYT-PICT 2017-1820, ANID/FONDAP/15150012, INECO Foundation, the Interamerican Development Bank (IDB), GBHI ALZ UK-20-639295, NIH NIA R01 AG057234, and the Multi-Partner Consortium to Expand Dementia Research in Latin America (ReDLat). Alzheimer’s Society Canada and the Weston Brain Institute (to FGF), National Institute for Translational Neuroscience (INNT/Brazil) (to FGF), the Brazilian funding agencies Conselho Nacional de Desenvolvimento Científico e Tecnológico (CNPq) and Fundação de Amparo à Pesquisa do Estado do Rio de Janeiro (FAPERJ) (to FGF). EPFR received funding from the Alzheimer’s Association. Alzheimer’s Association Research Grant 2018-AARG-591107 and REDI170583 (CDA). MIB is supported by grants from FONDECYT (Fondo de Desarrollo Científico y Tecnológico) Grant 1190958, FONDEF (Fondo de Fomento al Desarrollo Científico y Tecnológico Grant ID19I10302 and URedes URC-036/17). AS is partially supported by grants from ANID/FONDAP/15150012, ANID / Fondecyt/ 1141279. The contents of this publication are solely the responsibility of the authors and do not represent the official views of these Institutions. The other authors declare no conflict of interest.
